# Supplementary material
Source: PubMed Central journal article supplement (PMC4474234)
Supplement: NIHMS692538-supplement-01.pdf [file NIHMS692538-supplement-01.pdf]

## **Supplementary Materials**

1. Methods: Full search strategy (p. 1)
2. Table 1: Full table of criteria associated with diagnostic error (pp. 2-8)
3. Table 2: Full table of criteria not associated with diagnostic error (pp. 9-14)

### **1. Methods: Search strategy**

#### **PubMed:**

((("diagnostic error" OR "diagnostic errors" OR "diagnosis error" OR "diagnosis errors" OR "adverse event" OR "adverse events") AND ("Medical Errors/prevention and control"[Mesh] OR "Medical Errors/statistics and numerical data"[Mesh] OR "Malpractice/statistics and numerical data"[Mesh] OR "Medical Audit"[Mesh] OR "Medical Audit/methods"[Mesh] OR "Risk Management/methods"[Mesh]) AND English[lang])

#### **PubMed search for articles not yet indexed with MeSH terms:**

(((((("diagnostic error" OR "diagnostic errors" OR "diagnosis error" OR "diagnosis errors" OR "adverse event" OR "adverse events") AND ("detect" OR "detecting" OR "detection" OR "identify" OR "identification" OR "identifying" OR "trigger") AND ("2012/01/01"[PDAT] : "2013/12/31"[PDAT]) AND English[lang]))) NOT ("Humans"[Mesh]))) NOT ("Animals"[Mesh]))

Note: NOT ("Humans"[Mesh]) NOT ("Animals"[Mesh]) was our method for eliminating overlap with those articles already indexed with MeSH terms, essentially searching for "NOT (any) MeSH"

#### **Web of Science:**

((("diagnostic error" OR "diagnosis error" OR "adverse event") AND (detect\* OR identify\* OR "identification" OR "trigger")) IN "Topic"

Eliminate Social Science & Arts/Humanities databases (only Science)

#### **CINAHL (EBSCO):**

((diagnos\* AND error\*) OR (Adverse event\*)) AND ((MH "Diagnostic Errors") OR (MH "Health Care Errors") OR (MH "Failure to Diagnose") OR (MH "Malpractice") OR (MH "Risk Management") OR (MH "Record Review"))

Limits: English language, Peer reviewed, Exclude Pre-Cinahl, Exclude Medline

#### **CINAHL search for most recent, not yet indexed ("Pre-CINAHL"):**

(( (diagnos\* AND error\*) OR (Adverse event\*) ) AND ((detect\*) OR (identif\*) OR (trigger\*) OR (record) ) )

Limits: English language; Peer Reviewed; Search Only Pre-CINAHL

**Table 1: Signals of Potential Inpatient Diagnostic Error, Detailed Table**

| <b>CRITERIA AMENABLE TO AUTOMATED DETECTION</b> |                                         |                                                                                                                                                                                                |                                                                                                                                                                                                                |
|-------------------------------------------------|-----------------------------------------|------------------------------------------------------------------------------------------------------------------------------------------------------------------------------------------------|----------------------------------------------------------------------------------------------------------------------------------------------------------------------------------------------------------------|
| <b>Category</b>                                 | <b>Unique Concepts</b>                  | <b>Specific Wording</b>                                                                                                                                                                        | <b>Study(ies) Used</b>                                                                                                                                                                                         |
| Patient deterioration and resultant management  | <b>Death</b>                            | Death                                                                                                                                                                                          | O'Leary 2013, Pavao 2012, Mitchell 2008, Williams 2008, Resar 2006, Chapman 2003, Murff 2003, Wolff 2001, Thomas 2000, Bates 1995, Wolff 1995, Bates 1994, Brennan 1990, Hiatt 1989, Craddick 1983, Mills 1977 |
|                                                 |                                         | Unexpected death                                                                                                                                                                               | Wilson 2012, Calder 2010, Letaief 2010, Soop 2009, Kobayashi 2008, Sari 2007, Zegers 2007, Baker 2004, Forster 2004, Michel 2004, Kable 2002, Wilson 1995                                                      |
|                                                 |                                         | Death unrelated to natural course of illness and differing from immediate expected outcome of patient management                                                                               | Mitchell 2008                                                                                                                                                                                                  |
|                                                 |                                         | Death or disability associated with misuse or malfunction of a device                                                                                                                          | Mitchell 2008                                                                                                                                                                                                  |
|                                                 |                                         | Death meeting criteria but not referred to the Coroner's office                                                                                                                                | Mitchell 2008                                                                                                                                                                                                  |
|                                                 |                                         | In-hospital death with autopsy                                                                                                                                                                 | Herrera-Kiengelher 2005                                                                                                                                                                                        |
|                                                 |                                         | In-hospital death without autopsy                                                                                                                                                              | Herrera-Kiengelher 2005                                                                                                                                                                                        |
|                                                 | <i>Death joined with other criteria</i> | Death AFTER cardiac arrest team call OR unplanned ICU admission                                                                                                                                | De Meester 2013                                                                                                                                                                                                |
|                                                 |                                         | Cardiac/respiratory arrest, Death                                                                                                                                                              | Cappuccio 2009                                                                                                                                                                                                 |
|                                                 | <b>Cardiac/ respiratory arrest</b>      | Cardiac arrest                                                                                                                                                                                 | O'Leary 2013, Wolff 2001, Wolff 1995                                                                                                                                                                           |
|                                                 |                                         | Cardiorespiratory (cardiac or respiratory) arrest                                                                                                                                              | Soop 2009, Zegers 2007, Baker 2004, Forster 2004, Murff 2003, Kable 2002, Thomas 2000, Bates 1995, Bates 1994, Hiatt 1989                                                                                      |
|                                                 |                                         | Cardiac/respiratory arrest, low Apgar score (5-minute Apgar score of less than 6)                                                                                                              | Wilson 2012, Letaief 2010, Kobayashi 2008, Sari 2007, Michel 2004, Kable 2002, Wilson 1995, Brennan 1990, Craddick 1983                                                                                        |
|                                                 |                                         | Cardiac or respiratory arrest, including newborns with Apgar equal to or less than four at birth requiring resuscitation in delivery room [except: patient admitted for planned terminal care] | Mills 1977                                                                                                                                                                                                     |

|  |                                                                       |                                                                                                                                                                     |                                                                                                                                                                                                          |
|--|-----------------------------------------------------------------------|---------------------------------------------------------------------------------------------------------------------------------------------------------------------|----------------------------------------------------------------------------------------------------------------------------------------------------------------------------------------------------------|
|  |                                                                       | Reversed cardio-respiratory arrest                                                                                                                                  | Pavao 2012                                                                                                                                                                                               |
|  |                                                                       | Cardiac arrest team call (THEN death)                                                                                                                               | De Meester 2013                                                                                                                                                                                          |
|  |                                                                       | Condition complicated during hospital stay by intervening event (eg heart failure, DVT, PE, MI, pressure sore, neurological episode, cardiorespiratory arrest, etc) | Williams 2008, Chapman 2003                                                                                                                                                                              |
|  | <b>Activation of teams responding to acute patient decompensation</b> | Code, cardiac or pulmonary arrest or rapid response team activation                                                                                                 | Hwang 2013                                                                                                                                                                                               |
|  |                                                                       | Medical emergency team referral/response                                                                                                                            | Mitchell 2008, Braithwaite 2004                                                                                                                                                                          |
|  |                                                                       | Codes or arrest                                                                                                                                                     | Naessens 2010, Classen 2008                                                                                                                                                                              |
|  |                                                                       | Code                                                                                                                                                                | Resar 2006                                                                                                                                                                                               |
|  | <b>Increased acuity of care</b>                                       | (Unplanned) transfer from general care to intensive (or special or acute) care unit                                                                                 | Wilson 2012, Letaief 2010, Soop 2009, Kobayashi 2008, Sari 2007, Zegers 2007, Baker 2004, Murff 2003, Kable 2002, Wolff 2001, Thomas 2000, Brennan 1990, Wilson 1995, Wolff 1995, Hiatt 1989, Mills 1977 |
|  |                                                                       | Transfer from general care to special care unit (except: scheduled prior to procedures)                                                                             | Craddick 1983                                                                                                                                                                                            |
|  |                                                                       | Unplanned transfer from general care to intensive care or higher dependency                                                                                         | Michel 2004                                                                                                                                                                                              |
|  |                                                                       | (Unplanned) transfer to intensive (or semi-intensive or special) care unit                                                                                          | O'Leary 2013, Pavao 2012, Mitchell 2008, Herrera-Kiengelher 2005, Bates 1995, Bates 1994                                                                                                                 |
|  |                                                                       | Unplanned ICU admission (THEN death)                                                                                                                                | De Meester 2013                                                                                                                                                                                          |
|  |                                                                       | Transfer to a higher level of care                                                                                                                                  | Hwang 2013, Cappuccio 2009, Classen 2008, Resar 2006                                                                                                                                                     |
|  |                                                                       | Transfer of patient from general care to coronary care, neonatal intensive care, intensive care                                                                     | Mitchell 2008                                                                                                                                                                                            |
|  |                                                                       | Transfer to intermediate care                                                                                                                                       | Herrera-Kiengelher 2005                                                                                                                                                                                  |
|  |                                                                       | Readmission to ICU                                                                                                                                                  | Hwang 2013, Classen 2008, Resar 2006                                                                                                                                                                     |
|  | <b>Change of code status</b>                                          | Code status change in the unit                                                                                                                                      | Resar 2006                                                                                                                                                                                               |
|  | <b>Intubation</b>                                                     | Intubation/re-intubation                                                                                                                                            | Hwang 2013, Naessens 2010, Classen 2008, Resar 2006                                                                                                                                                      |

|                                 |                                                 |                                                                                                                                                                     |                                                         |
|---------------------------------|-------------------------------------------------|---------------------------------------------------------------------------------------------------------------------------------------------------------------------|---------------------------------------------------------|
|                                 | <b>New dialysis</b>                             | New dialysis                                                                                                                                                        | O'Leary 2013, Resar 2006                                |
|                                 | <b>Unexpected surgery or other procedure</b>    | Unplanned visit to operating theatre or elsewhere for procedure                                                                                                     | Williams 2008, Chapman 2003                             |
|                                 |                                                 | Unplanned transfer or return to the operating room                                                                                                                  | Forster 2004, Michel 2004                               |
| Prolonged hospitalization       | <b>LOS longer than threshold number of days</b> | Length of stay greater than 35 days                                                                                                                                 | Wolff 1995                                              |
|                                 |                                                 | Hospital stay >30 days                                                                                                                                              | Herrera-Kiengelher 2005                                 |
|                                 |                                                 | Length of stay exceeding 21 days                                                                                                                                    | Wolff 2001                                              |
|                                 |                                                 | Length of admission >10 days                                                                                                                                        | Williams 2008, Chapman 2003                             |
|                                 | <b>LOS longer than expected</b>                 | Length of admission longer than expected                                                                                                                            | Williams 2008, Chapman 2003                             |
|                                 |                                                 | Unexpectedly long LOS (LOS >50% expected)                                                                                                                           | Cihangir 2013                                           |
|                                 | <b>LOS longer than percentile for DRG</b>       | Length of hospital stay above 90th percentile for diagnosis-related group in patients under 70, and 95th percentile in those 70 or older                            | Hiatt 1989                                              |
|                                 |                                                 | Length of stay exceeds the number of days listed at the 90th percentile [except: excessive LOS due solely to non-medical problems (administrative or social delay)] | Mills 1977                                              |
|                                 |                                                 | Length of stay greater than ___ percentile or allotted days (individual hospital criteria)                                                                          | Craddick 1983                                           |
|                                 |                                                 | Greater than 7 days in ICU                                                                                                                                          | Resar 2006                                              |
| Subsequent healthcare encounter | <b>Subsequent readmission</b>                   | Unplanned readmission to any hospital during the 12 months following discharge from the index admission                                                             | Pavao 2012, Kobayashi 2008                              |
|                                 |                                                 | Readmission within 30 days/Unplanned readmission after discharge from index admission within 30 days                                                                | Hwang 2013, Naessens 2010, Cappuccio 2009, Classen 2008 |
|                                 |                                                 | Unplanned readmission within 28 days after discharge                                                                                                                | Wolff 1995                                              |
|                                 |                                                 | Unplanned readmission within 21 days of discharge                                                                                                                   | Wolff 2001                                              |

|                                                 |                                                               |                                                                                                                                                                          |                                                                                                                                                                                                                                                                                             |
|-------------------------------------------------|---------------------------------------------------------------|--------------------------------------------------------------------------------------------------------------------------------------------------------------------------|---------------------------------------------------------------------------------------------------------------------------------------------------------------------------------------------------------------------------------------------------------------------------------------------|
|                                                 |                                                               | Short-term hospital readmission (in 15 days)                                                                                                                             | Herrera-Kiengelher 2005                                                                                                                                                                                                                                                                     |
|                                                 |                                                               | Hospital readmission within 72 hours                                                                                                                                     | Mitchell 2008                                                                                                                                                                                                                                                                               |
|                                                 |                                                               | (Unplanned) readmission after discharge                                                                                                                                  | O'Leary 2013, Wilson 2012, Letaief 2010, Soop 2009, Zegers 2007, Baker 2004, Kable 2002, Thomas 2000, Bates 1995, Wilson 1995, Brennan 1990, Hiatt 1989, Mills 1977                                                                                                                         |
|                                                 |                                                               | Unplanned readmission related to the care provided in the index admission                                                                                                | Sari 2007                                                                                                                                                                                                                                                                                   |
|                                                 | <b>Subsequent outpatient or ED visit, causally associated</b> | Subsequent visit to ER or outpatient doctor for complication or adverse results related to this hospitalization                                                          | Craddick 1983                                                                                                                                                                                                                                                                               |
| Change of general management (team or facility) | <b>Change of facility</b>                                     | Unplanned transfer to another hospital/acute care hospital or facility                                                                                                   | O'Leary 2013, Wilson 2012, Letaief 2010, Soop 2009, Kobayashi 2008, Williams 2008, Sari 2007, Herrera-Kiengelher 2005, Baker 2004, Michel 2004, Chapman 2003, Kable 2002, Wolff 2001, Thomas 2000, Wolff 1995, Bates 1995, Wilson 1995, Wolff 1995, Brennan 1990, Hiatt 1989, Craddick 1983 |
|                                                 |                                                               | (Unplanned) transfer from or to another acute care hospital (excluding transfers for specialized exams or procedures, or mandatory transfers for administrative reasons) | Pavao 2012, Mills 1977                                                                                                                                                                                                                                                                      |
|                                                 | <b>Change of physician or team</b>                            | Abrupt change of physician in charge                                                                                                                                     | Resar 2006                                                                                                                                                                                                                                                                                  |
|                                                 | <b>Multiple consultations</b>                                 | 3 or more consultants                                                                                                                                                    | Resar 2006                                                                                                                                                                                                                                                                                  |
| Change of specific treatment plan               | <b>Change of medications</b>                                  | Abrupt medication stop/Abrupt cessation of medications                                                                                                                   | Hwang 2013, O'Leary 2013, Naessens 2010, Cappuccio 2009, Classen 2008                                                                                                                                                                                                                       |
|                                                 | <b>Change of procedure</b>                                    | Change in procedure                                                                                                                                                      | Hwang 2013, Naessens 2010, Classen 2008                                                                                                                                                                                                                                                     |
|                                                 | <b>Cancellation of procedure</b>                              | Patient booked for theatre and cancelled                                                                                                                                 | Wolff 1995                                                                                                                                                                                                                                                                                  |
| Discordance between diagnoses and test results  | <b>Difference between diagnosis and pathology results</b>     | Pathology report normal or unrelated to diagnosis                                                                                                                        | Naessens 2010, Classen 2008                                                                                                                                                                                                                                                                 |

| <b>CRITERIA NOT LIKELY AVAILABLE IN ELECTRONIC FORMAT</b> |                                          |                                                                                                                                |                                                                                                                                                                                  |
|-----------------------------------------------------------|------------------------------------------|--------------------------------------------------------------------------------------------------------------------------------|----------------------------------------------------------------------------------------------------------------------------------------------------------------------------------|
| Dissatisfaction with care                                 | <b>Patient dissatisfaction</b>           | Patient or relative made complaint regarding care                                                                              | Williams 2008, Chapman 2003                                                                                                                                                      |
|                                                           |                                          | Dissatisfaction with care documented in the medical record                                                                     | Letaief 2010, Soop 2009, Kobayashi 2008, Kable 2002, Sari 2007, Zegers 2007, Baker 2004, Kable 2002, Wilson 1995                                                                 |
|                                                           |                                          | Dissatisfaction with care received as documented on patient record, or evidence of complaint lodged                            | Pavao 2012                                                                                                                                                                       |
|                                                           |                                          | Patient/family dissatisfaction with care received documented in the medical record and/or evidence of complaint lodged         | Wilson 2012, Forster 2004, Craddick 1983                                                                                                                                         |
|                                                           |                                          | Complaint about quality of service                                                                                             | Herrera-Kiengelher 2005                                                                                                                                                          |
|                                                           |                                          | Family complaints                                                                                                              | Resar 2006                                                                                                                                                                       |
|                                                           | <b>Patient pursuing litigation</b>       | Documentation or correspondence suggesting/indicating litigation (either contemplated or actual)                               | Pavao 2012, Wilson 2012, Letaief 2010, Soop 2009, Kobayashi 2008, Sari 2007, Zegers 2007, Baker 2004, Forster 2004, Kable 2002, Thomas 2000, Bates 1995, Wilson 1995, Hiatt 1989 |
|                                                           |                                          | Legal suit                                                                                                                     | Herrera-Kiengelher 2005                                                                                                                                                          |
|                                                           | <b>Both complaint and litigation</b>     | Patient or family dissatisfaction with care received documented in the medical record, or documentation of claim or litigation | Michel 2004                                                                                                                                                                      |
|                                                           | <b>Provider dissatisfaction</b>          | Doctor or Nurse unhappy about any aspect of care                                                                               | Williams 2008                                                                                                                                                                    |
| Reporting external to EHR                                 | <b>Referral to hospital ethics board</b> | Specific case referral                                                                                                         | Mitchell 2008                                                                                                                                                                    |
|                                                           | <b>Incident report to external board</b> | High-level incident report                                                                                                     | Mitchell 2008                                                                                                                                                                    |
| Clinical judgment needed for interpretation               | <b>Delays in diagnosis/detection</b>     | Diagnosis significantly delayed at any stage of admission                                                                      | Williams 2008                                                                                                                                                                    |
|                                                           |                                          | Significant delay in diagnosis/initiating effective treatment at any stage of admission                                        | Chapman 2003                                                                                                                                                                     |

|                                                            |                                                                              |                                                                                                                                                                                                                                                                            |                                                               |
|------------------------------------------------------------|------------------------------------------------------------------------------|----------------------------------------------------------------------------------------------------------------------------------------------------------------------------------------------------------------------------------------------------------------------------|---------------------------------------------------------------|
|                                                            |                                                                              | Abnormal laboratory, medical imaging, physical findings or other tests not followed up or addressed                                                                                                                                                                        | Mitchell 2008, Craddick 1983                                  |
|                                                            | <b>Other diagnostic error</b>                                                | Diagnostic error -- missed, delayed, misdiagnosis                                                                                                                                                                                                                          | Mitchell 2008                                                 |
|                                                            | <b>Inadequate observation</b>                                                | Patient deterioration OR death OR medical emergency team referral AFTER inadequate observation process                                                                                                                                                                     | Mitchell 2008                                                 |
|                                                            | <b>Undefined deterioration</b>                                               | Worsening condition                                                                                                                                                                                                                                                        | Herrera-Kiengelher 2005                                       |
|                                                            |                                                                              | Documented pain or psychological or social injury                                                                                                                                                                                                                          | Michel 2004                                                   |
| <b>CRITERIA SUGGESTIVE OF ERROR IN PREVIOUS MANAGEMENT</b> |                                                                              |                                                                                                                                                                                                                                                                            |                                                               |
| Previous management                                        | <b>Previous healthcare (any), causally associated with current admission</b> | Unplanned admission as a result of health care provided during the 12 months prior to the index admission                                                                                                                                                                  | Pavao 2012, Wilson 2012, Michel 2004, Kable 2002              |
|                                                            |                                                                              | Unplanned admission related to previous healthcare management                                                                                                                                                                                                              | Soop 2009, Sari 2007, Forster 2004                            |
|                                                            |                                                                              | Admission for complications or incomplete management of problems on previous hospitalization (except: occurred at another hospital and did not involve any member of this medical staff, or readmission for chronic disease excluded by medical staff-determined criteria) | Craddick 1983                                                 |
|                                                            | <b>Previous hospitalization</b>                                              | Previous admission to any hospital in the past 12 months                                                                                                                                                                                                                   | Letaief 2010, Williams 2008, Chapman 2003                     |
|                                                            |                                                                              | Prior hospitalization within 1 year (patients <65 years of age), or prior hospitalization within 6 months (patients >=65 years old)                                                                                                                                        | Thomas 2000, Bates 1995, Brennan 1990, Hiatt 1989, Mills 1977 |
|                                                            |                                                                              | Admission to hospital as a result of clinical management at another hospital                                                                                                                                                                                               | Mitchell 2008                                                 |
|                                                            |                                                                              | Unplanned admission before index admission                                                                                                                                                                                                                                 | Kobayashi 2008, Zegers 2007, Baker 2004, Wilson 1995          |
|                                                            |                                                                              | Transfer from another acute care hospital                                                                                                                                                                                                                                  | Forster 2004, Murff 2003                                      |

|  |                                       |                                                                                                                                                                                                      |               |
|--|---------------------------------------|------------------------------------------------------------------------------------------------------------------------------------------------------------------------------------------------------|---------------|
|  | <b>Previous outpatient management</b> | Admission to acute hospital as a result of outpatient management or procedure                                                                                                                        | Mitchell 2008 |
|  |                                       | Admission for complications or adverse results of outpatient management [except: previous medical care was unrelated to this hospital's OPD/ER or did not involve any member of this hospital staff] | Craddick 1983 |



**Table 2: Criteria Unlikely to be Useful Triggers for Inpatient Diagnostic Error**

| <u>CATEGORY</u>            | <u>SUBCATEGORY</u>                                    | <u>SPECIFIC WORDING</u>                                                                                                                                            | <u>EXAMPLE STUDY(IES)</u> |
|----------------------------|-------------------------------------------------------|--------------------------------------------------------------------------------------------------------------------------------------------------------------------|---------------------------|
| <b>Adverse drug events</b> | Drug toxicity, lab value detection                    | Elevated digoxin level                                                                                                                                             | O'Leary 2013              |
|                            | Usage of a rescue medication as antidote for overdose | Vitamin K administration                                                                                                                                           | Hwang 2013                |
|                            |                                                       | Romazicon (Flumazenil) administration                                                                                                                              | Hwang 2013                |
|                            |                                                       | Naloxone (Narcan) administration                                                                                                                                   | Hwang 2013                |
|                            |                                                       | Digoxin immune Fab administration                                                                                                                                  | O'Leary 2013              |
|                            | Overdose, other finding                               | Over-sedation/hypotension                                                                                                                                          | Hwang 2013                |
|                            | Use of high-risk medications                          | Diphenhydramine (Benadryl) use                                                                                                                                     | Hwang 2013                |
|                            |                                                       | Anti-emetic use                                                                                                                                                    | Hwang 2013                |
|                            |                                                       | Vancomycin administration                                                                                                                                          | O'Leary 2013              |
|                            |                                                       | Haloperidol administration                                                                                                                                         | O'Leary 2013              |
|                            |                                                       | Ondansetron administration                                                                                                                                         | O'Leary 2013              |
|                            |                                                       | Polyethylene glycol administration                                                                                                                                 | O'Leary 2013              |
|                            |                                                       | Linezolid administration                                                                                                                                           | O'Leary 2013              |
|                            |                                                       | Loperamide administration                                                                                                                                          | O'Leary 2013              |
|                            |                                                       | Risperidone administration                                                                                                                                         | O'Leary 2013              |
|                            |                                                       | Parenteral analgesics last full day prior to and/or day of discharge [except: terminal cancer, preop med, postop med for 48 hrs subsequent to operative procedure] | Mills 1977                |
|                            |                                                       | Antibiotic/drug utilization (as developed by the medical staff)                                                                                                    | Craddick 1983             |
|                            | General                                               | New allergy                                                                                                                                                        | O'Leary 2013              |
|                            |                                                       | Adverse drug reaction (no other specification)                                                                                                                     | Wilson 2012               |
| <b>Abnormal labs</b>       | (Considered part of "medication module" in GTT)       | Partial thromboplastin time (PTT) greater than 100 seconds                                                                                                         | Hwang 2013                |
|                            |                                                       | International normalized ratio (INR) greater than 6                                                                                                                | Hwang 2013                |
|                            |                                                       | Glucose less than 50 mg/dl                                                                                                                                         | Hwang 2013                |
|                            |                                                       | Rising BUN or serum creatinine greater than two times over baseline                                                                                                | Hwang 2013                |

|                                          |                                  |                                                                                                                                               |                          |
|------------------------------------------|----------------------------------|-----------------------------------------------------------------------------------------------------------------------------------------------|--------------------------|
|                                          |                                  | Hyperkalemia                                                                                                                                  | O'Leary 2013             |
|                                          | General lab trigger              | Panic or abnormal laboratory result                                                                                                           | Bates 1994               |
| <b>Nosocomial infections</b>             | Lab finding indicating diagnosis | Positive blood culture                                                                                                                        | Hwang 2013               |
|                                          |                                  | Urine culture positive                                                                                                                        | O'Leary 2013             |
|                                          | Finding suggestive of infection  | Fever (temperature >101F/38.3C) on day of discharge                                                                                           | O'Leary 2013, Mills 1977 |
|                                          |                                  | Discharge with indwelling urinary catheter [except: transferred to extended care facility, >70 years, admitted with urinary catheter]         | Mills 1977               |
|                                          | Both infection & drug-related    | Clostridium difficile positive culture                                                                                                        | Hwang 2013               |
|                                          | Diagnosis of infection           | Pneumonia onset (ICU module of GTT)                                                                                                           | Hwang 2013, Classen 2008 |
|                                          |                                  | Healthcare-associated infections (or sepsis)                                                                                                  | Hwang 2013               |
| <b>Procedure- related Adverse Events</b> | Reoperation                      | Return to operating room this admission [except: planned second procedure]                                                                    | Hwang 2013, Mills 1977   |
|                                          |                                  | Back in the operating room within 7 days                                                                                                      | Matranga 2013            |
|                                          | Intraoperative complications     | Injury, repair or removal of organ during operative procedure                                                                                 | Hwang 2013, Mills 1977   |
|                                          |                                  | Patient operated for repair of a laceration, perforation, tear or puncture or an organ subsequent to the performance of an invasive procedure | Mills 1977               |
|                                          |                                  | X-ray intraoperatively or in post anaesthesia care unit                                                                                       | Hwang 2013               |
|                                          |                                  | Intraoperative administration of epinephrine, norepinephrine, naloxone, or romazicon                                                          | Hwang 2013               |
|                                          |                                  | Intra- or post-operative death                                                                                                                | Classen 2008             |
|                                          |                                  | Death of patient who had been generally healthy during or immediately after surgery for localised problem                                     | Mitchell 2008            |
|                                          |                                  | S13 Insertion of arterial or central venous line during surgery                                                                               | Classen 2008             |
|                                          |                                  | Unplanned event occurred during surgery/procedure/anesthesia                                                                                  | Williams 2008            |
|                                          |                                  | Unplanned open surgery after closed or laparoscopic surgery                                                                                   | Michel 2004              |
|                                          | Postoperative complications      | Post-procedure MI, CVA, PE                                                                                                                    | Hwang 2013, Hiatt 1989   |
|                                          |                                  | Admission to intensive care post-operatively                                                                                                  | Hwang 2013               |

|                                                |              |                                                                                  |                        |
|------------------------------------------------|--------------|----------------------------------------------------------------------------------|------------------------|
|                                                |              | Intubation or reintubation or use of BiPap in post anaesthesia care unit (PACU)  | Hwang 2013             |
|                                                |              | Mechanical ventilation greater than 24 hours post-operatively                    | Hwang 2013             |
|                                                |              | Post-operative increase in troponin levels greater than 1.5 nanogram mL          | Hwang 2013             |
|                                                |              | Occurrence of any operative complication                                         | Hwang 2013             |
|                                                |              | Procedure associated event                                                       | Resar 2006             |
|                                                |              | Treatment or surgery for damaged organ subsequent to an invasive procedure       | Brennan 1990           |
|                                                |              | Acute myocardial infarction and a surgical procedure on same admission           | Mills 1977             |
|                                                |              | Wound infection present on last full day prior to or day of discharge            | Mills 1977             |
| <b>Falls or in-hospital trauma</b>             |              | Fall                                                                             | Hwang 2013             |
|                                                |              | Fall incident report                                                             | O'Leary 2013           |
|                                                |              | Fall note type                                                                   | O'Leary 2013           |
|                                                |              | Hospital incurred patient injury                                                 | Wilson 2012            |
|                                                |              | Injury to patient incurred in hospital (for example, fall, burn, pressure ulcer) | Sari 2006              |
| <b>Venous thromboembolic events</b>            |              | X-ray or Doppler studies for emboli                                              | Hwang 2013             |
|                                                |              | Venous thromboembolism diagnosis code                                            | O'Leary 2013           |
| <b>Stroke/neurologic complications</b>         |              | In-hospital stroke                                                               | Hwang 2013             |
|                                                |              | CT brain                                                                         | O'Leary 2013           |
|                                                |              | Stroke note type                                                                 | O'Leary 2013           |
|                                                |              | Development of a neurologic defect not present on admission                      | Pavao 2012, Mills 1977 |
| <b>Pressure ulcers</b>                         |              | Pressure ulcers                                                                  | Hwang 2013             |
| <b>Myocardial infarction</b>                   | By diagnosis | Myocardial infarction                                                            |                        |
|                                                | By lab value | Elevated troponin                                                                | O'Leary 2013           |
| <b>Other possibly iatrogenic complications</b> | Xray         | X-rays indicating pneumothorax                                                   | Bates 1994             |

|                                            |                                  |                                                                                                                |                             |
|--------------------------------------------|----------------------------------|----------------------------------------------------------------------------------------------------------------|-----------------------------|
| <b>Other high risk procedure</b>           |                                  | Dialysis (any)                                                                                                 | Hwang 2013                  |
|                                            |                                  | Restraint use                                                                                                  | Hwang 2013                  |
| <b>Bleeding</b>                            | Requiring transfusion            | Transfusion of blood or use of blood products                                                                  | GTT                         |
|                                            |                                  | Transfusion of platelets                                                                                       | O'Leary 2013                |
|                                            |                                  | Transfusion: bleeding/anemia, iatrogenic; not clinically indicated; transfusion reaction                       | Craddick 1983               |
|                                            | As inferred from changes in labs | Abrupt drop of greater than 25% in haemoglobin or haematocrit within 72 hours                                  | Hwang 2013                  |
|                                            |                                  | Drop in haematocrit                                                                                            | O'Leary 2013                |
|                                            |                                  | Abrupt drop in Hg>4                                                                                            | Resar 2006                  |
| <b>Psychiatric crises</b>                  | Suicide attempt causing harm     | Patient attempting suicide, resulting in serious disability or admission to intensive care unit                | Mitchell 2008               |
| <b>Indicator only of severe disease</b>    | Intensive care                   | Required period of intensive or high dependency care                                                           | Williams 2008, Chapman 2003 |
| <b>Specific to intensive care only</b>     |                                  | In-unit procedure                                                                                              | Classen 2008                |
|                                            |                                  | Chest tube insertion                                                                                           | Resar 2006                  |
|                                            |                                  | Tracheostomy done                                                                                              | Resar 2006                  |
|                                            |                                  | Albumin <2                                                                                                     | Resar 2006                  |
|                                            |                                  |                                                                                                                |                             |
| <b>Specific to obstetrics/perinatology</b> |                                  | Apgar less than 7 at 5 minutes                                                                                 | Classen 2008                |
|                                            |                                  | Maternal/neonatal transport/transfer                                                                           | Classen 2008                |
|                                            |                                  | Magnesium sulfate or terbutaline use                                                                           | Classen 2008                |
|                                            |                                  | Infant serum glucose less than 50 mg/dl                                                                        | Classen 2008                |
|                                            |                                  | Third- or fourth-degree lacerations                                                                            | Classen 2008                |
|                                            |                                  | Induction of delivery                                                                                          | Classen 2008                |
|                                            |                                  | Platelet count less than 50,000                                                                                | Hwang 2013                  |
|                                            |                                  | Estimated blood loss greater than 500 ml for vaginal delivery, or greater than 1,000 ml for caesarean delivery | Hwang 2013                  |
|                                            |                                  | Specialty consult                                                                                              | Hwang 2013                  |
|                                            |                                  | Administration of oxytocic agents                                                                              | Hwang 2013                  |
|                                            |                                  | Instrumented delivery                                                                                          | Hwang 2013                  |
|                                            |                                  | Administration of general anaesthesia                                                                          | Hwang 2013                  |

|                                              |                                                   |                                                                                                                                                          |                         |
|----------------------------------------------|---------------------------------------------------|----------------------------------------------------------------------------------------------------------------------------------------------------------|-------------------------|
|                                              |                                                   | Obstetric mishap or complication of abortion or labor-delivery                                                                                           | Brennan 1990            |
| <b>Specific to emergency department only</b> |                                                   | Readmission to ED within 48 hours                                                                                                                        | Classen 2008            |
|                                              |                                                   | Time in ED greater than 6 hours                                                                                                                          | Classen 2008            |
| <b>Only administrative error</b>             |                                                   | Clerical administration error related to patient information (eg, incorrect name, unique patient identifier)                                             | Mitchell 2008           |
|                                              |                                                   | Non-adherence to clinical policy, procedure or guideline impacting on patient outcome                                                                    | Mitchell 2008           |
|                                              |                                                   | Adverse outcome associated with patient transfer or retrieval                                                                                            | Mitchell 2008           |
|                                              |                                                   | Operative consent problems (incomplete, missing, for a different procedure or surgeon, other)                                                            | Craddick 1983           |
|                                              |                                                   | Departmental or other problem (e.g., admitting, ER, laboratory, x-ray)                                                                                   | Craddick 1983           |
| <b>Vague: "catch-all" screening category</b> | "Catch-all" category for manual review            | Care: other                                                                                                                                              | Hwang 2013              |
|                                              |                                                   | Medication: other                                                                                                                                        | Hwang 2013              |
|                                              |                                                   | Any other undesirable outcome not covered above                                                                                                          | Hiatt 1989              |
|                                              |                                                   | Other patient complication                                                                                                                               | Mills 1977              |
|                                              |                                                   | Other unexpected complications during index admission which are NOT a normal development of the patient's disease or an expected result of the treatment | Pavao 2012              |
|                                              |                                                   | Any unwanted events not mentioned above                                                                                                                  | Pavao 2012              |
|                                              |                                                   | Other finding on chart review suggestive of an adverse event                                                                                             | Bates 1995              |
|                                              | Multiple events considered a single criterion     | Other patient complications to include: AMI, CVA, PE, etc                                                                                                | Wilson 2012             |
|                                              |                                                   | Other complications (for example, DVT, MI, CVA, PE, ARF)                                                                                                 | Sari 2006               |
|                                              |                                                   | Hospital-incurred patient incident: fall, IV problem, medication error, skin problem, other                                                              | Craddick 1983           |
|                                              | Patient decision-making contradicting physician's | Hospital discharge decided by patient against medical advice                                                                                             | Herrera-Kiengelher 2005 |

|                                                                 |  |                                                                                                                                                                     |                             |
|-----------------------------------------------------------------|--|---------------------------------------------------------------------------------------------------------------------------------------------------------------------|-----------------------------|
| <b>Requires significant clinical judgment or interpretation</b> |  | Inappropriate hospital discharge/inadequate discharge plan from index admission                                                                                     | Pavao 2012                  |
|                                                                 |  | Poorly planned discharge from hospital                                                                                                                              | Mitchell 2008               |
|                                                                 |  | Previous failure of or untoward result from medical management                                                                                                      | Murff 2003,<br>Brennan 1990 |
|                                                                 |  | Admitted (from any source, including transfer from another health care facility) for conditions suggesting potential prior failure or adverse results of management | Mills 1977                  |
| <b>Requires individual hospital to define criteria</b>          |  | Medical records review--physician                                                                                                                                   | Craddick 1983               |
|                                                                 |  | Medical records review--nursing                                                                                                                                     | Craddick 1983               |
